# Supplementary material for: Impact of SNPs in ACACA, SCD1, and DGAT1 Genes on Fatty Acid Profile in Bovine Milk with Regard to Lactation Phases
Source: PubMed Central journal article supplement (PMC7341249; doi:10.3390/ani10060997), 2020-06-08
Supplement: animals-10-00997-s001.pdf [file animals-10-00997-s001.pdf]

Table S 1. Percentage (mean  $\pm$  SD) of fatty acids, fat, protein and lactose in milk from Polish Holstein-Frisian cows during 1st and 2nd phase of lactation depending on AJ312201.1g.1488C>G (g.1488C>G) Single Nucleotide Polymorphism (SNP) in Acetyl-CoA Carboxylase  $\alpha$  (ACACA) gene.

| Fatty acid<br>(%)                     | ACACA gene polymorphism       |                                            |                               |                                            |                               |                                           |
|---------------------------------------|-------------------------------|--------------------------------------------|-------------------------------|--------------------------------------------|-------------------------------|-------------------------------------------|
|                                       | CC                            |                                            | CG                            |                                            | GG                            |                                           |
|                                       | (n = 88)                      |                                            | (n = 50)                      |                                            | (n = 6)                       |                                           |
|                                       | 1 <sup>st</sup>               | 2 <sup>nd</sup>                            | 1 <sup>st</sup>               | 2 <sup>nd</sup>                            | 1 <sup>st</sup>               | 2 <sup>nd</sup>                           |
| C4:0                                  | 0.75 $\pm$ 0.32               | 0.74 $\pm$ 0.25                            | 0.72 $\pm$ 0.30               | 0.76 $\pm$ 0.26                            | 0.67 $\pm$ 0.13               | 0.69 $\pm$ 0.17                           |
| C6:0                                  | 0.89 $\pm$ 0.22               | 0.92 $\pm$ 0.20                            | 0.90 $\pm$ 0.24               | 0.93 $\pm$ 0.19                            | 0.94 $\pm$ 0.16               | 0.92 $\pm$ 0.12                           |
| C8:0                                  | 0.71 <sup>A</sup> $\pm$ 0.16  | 0.78 <sup>A</sup> $\pm$ 0.13 $\uparrow$    | 0.75 $\pm$ 0.17               | 0.78 $\pm$ 0.13                            | 0.82 $\pm$ 0.17               | 0.81 $\pm$ 0.07                           |
| C10:0                                 | 1.80 <sup>A</sup> $\pm$ 0.53  | 2.28 <sup>A</sup> $\pm$ 0.36 $\uparrow$    | 1.94 <sup>B</sup> $\pm$ 0.53  | 2.24 <sup>B</sup> $\pm$ 0.40 $\uparrow$    | 2.30 $\pm$ 0.59               | 2.37 $\pm$ 0.32                           |
| C12:0                                 | 2.12 <sup>A</sup> $\pm$ 0.68  | 3.15 <sup>A</sup> $\pm$ 0.45 $\uparrow$    | 2.24 <sup>B</sup> $\pm$ 0.69  | 3.00 <sup>B</sup> $\pm$ 0.69 $\uparrow$    | 2.82 $\pm$ 0.76               | 3.28 $\pm$ 0.47                           |
| C13:0                                 | 0.12 $\pm$ 0.17               | 0.11 $\pm$ 0.03                            | 0.13 $\pm$ 0.17               | 0.12 $\pm$ 0.04                            | 0.16 $\pm$ 0.13               | 0.14 $\pm$ 0.10                           |
| C14:0                                 | 7.71 <sup>A</sup> $\pm$ 1.64  | 11.04 <sup>A</sup> $\pm$ 0.88 $\uparrow$   | 8.25 <sup>B</sup> $\pm$ 1.61  | 10.93 <sup>B</sup> $\pm$ 1.08 $\uparrow$   | 9.27 <sup>C</sup> $\pm$ 1.26  | 11.38 <sup>C</sup> $\pm$ 0.93 $\uparrow$  |
| C15:0                                 | 0.81 <sup>A</sup> $\pm$ 0.24  | 1.33 <sup>A</sup> $\pm$ 0.20 $\uparrow$    | 0.87 <sup>B</sup> $\pm$ 0.19  | 1.34 <sup>B</sup> $\pm$ 0.27 $\uparrow$    | 1.07 $\pm$ 0.29               | 1.53 $\pm$ 0.52 $\uparrow$                |
| C16:0                                 | 27.48 <sup>A</sup> $\pm$ 2.12 | 30.64 <sup>A</sup> $\pm$ 2.57 $\uparrow$   | 28.02 <sup>B</sup> $\pm$ 2.19 | 30.67 <sup>B</sup> $\pm$ 2.99 $\uparrow$   | 29.26 $\pm$ 0.96              | 29.99 $\pm$ 2.60                          |
| C17:0                                 | 0.69 <sup>A</sup> $\pm$ 0.15  | 0.57 <sup>A</sup> $\pm$ 0.09 $\downarrow$  | 0.67 <sup>B</sup> $\pm$ 0.12  | 0.58 <sup>B</sup> $\pm$ 0.07 $\downarrow$  | 0.68 $\pm$ 0.10               | 0.61 $\pm$ 0.11                           |
| C18:0                                 | 11.75 <sup>A</sup> $\pm$ 1.65 | 8.40 <sup>A</sup> $\pm$ 1.38 $\downarrow$  | 11.67 <sup>B</sup> $\pm$ 1.67 | 8.48 <sup>B</sup> $\pm$ 1.60 $\downarrow$  | 11.75 <sup>a</sup> $\pm$ 1.54 | 7.67 <sup>a</sup> $\pm$ 1.92 $\downarrow$ |
| C20:0                                 | 0.12 $\pm$ 0.03               | 0.12 $\pm$ 0.03                            | 0.12 $\pm$ 0.04               | 0.12 $\pm$ 0.03                            | 0.15 $\pm$ 0.04               | 0.12 $\pm$ 0.04                           |
| C14:1                                 | 0.79 <sup>A</sup> $\pm$ 0.26  | 1.59 <sup>A</sup> $\pm$ 0.32 $\uparrow$    | 0.84 <sup>B</sup> $\pm$ 0.28  | 1.54 <sup>B</sup> $\pm$ 0.31 $\uparrow$    | 0.71 <sup>C</sup> $\pm$ 0.31  | 1.65 <sup>C</sup> $\pm$ 0.36 $\uparrow$   |
| DI C14                                | 0.09 <sup>A</sup> $\pm$ 0.03  | 0.13 <sup>A</sup> $\pm$ 0.02 $\uparrow$    | 0.09 <sup>B</sup> $\pm$ 0.02  | 0.12 <sup>B</sup> $\pm$ 0.02 $\uparrow$    | 0.07 <sup>C</sup> $\pm$ 0.03  | 0.13 <sup>C</sup> $\pm$ 0.03 $\uparrow$   |
| C16:1                                 | 4.46 <sup>A</sup> $\pm$ 1.46  | 5.67 <sup>A</sup> $\pm$ 1.15 $\uparrow$    | 4.26 <sup>B</sup> $\pm$ 1.38  | 5.76 <sup>B</sup> $\pm$ 1.35 $\uparrow$    | 4.15 $\pm$ 1.56               | 5.59 $\pm$ 1.30                           |
| DI C16                                | 0.14 <sup>A</sup> $\pm$ 0.05  | 0.16 <sup>A</sup> $\pm$ 0.03 $\uparrow$    | 0.13 <sup>B</sup> $\pm$ 0.04  | 0.16 <sup>B</sup> $\pm$ 0.03 $\uparrow$    | 0.12 $\pm$ 0.04               | 0.16 $\pm$ 0.03                           |
| C17:1                                 | 0.52 <sup>A</sup> $\pm$ 0.14  | 0.29 <sup>A</sup> $\pm$ 0.09 $\downarrow$  | 0.47 <sup>B</sup> $\pm$ 0.14  | 0.20 <sup>B</sup> $\pm$ 0.09 $\downarrow$  | 0.43 $\pm$ 0.13               | 0.30 $\pm$ 0.12 $\downarrow$              |
| C18:1 <i>cis</i> -9                   | 27.81 <sup>A</sup> $\pm$ 4.06 | 19.21 <sup>A</sup> $\pm$ 2.06 $\downarrow$ | 29.86 <sup>B</sup> $\pm$ 4.06 | 19.03 <sup>B</sup> $\pm$ 2.39 $\downarrow$ | 24.12 $\pm$ 5.27              | 20.58 $\pm$ 2.58                          |
| C18:1 <i>cis</i> -8 ( <i>cis</i> -11) | 1.27 <sup>A</sup> $\pm$ 0.20  | 0.92 <sup>A</sup> $\pm$ 0.21 $\downarrow$  | 1.26 <sup>B</sup> $\pm$ 0.19  | 0.98 <sup>B</sup> $\pm$ 0.25 $\downarrow$  | 1.11 $\pm$ 0.19               | 1.06 $\pm$ 0.26                           |
| DI C18                                | 0.70 $\pm$ 0.04               | 0.71 $\pm$ 0.04                            | 0.70 $\pm$ 0.04               | 0.70 $\pm$ 0.04                            | 0.67 $\pm$ 0.04               | 0.74 $\pm$ 0.04                           |

|                                           |                          |                           |                          |                           |                         |                          |
|-------------------------------------------|--------------------------|---------------------------|--------------------------|---------------------------|-------------------------|--------------------------|
| C18:1 <i>trans</i> -9                     | 0.84 <sup>A</sup> ±0.63  | 1.08 <sup>A</sup> ±0.31↑  | 0.80 <sup>B</sup> ±0.57  | 1.15 <sup>B</sup> ±0.39↑  | 0.70±0.59               | 0.92±0.25                |
| C18:1 <i>trans</i> -7 ( <i>trans</i> -11) | 1.38 <sup>A</sup> ±0.46  | 1.22 <sup>A</sup> ±0.24↓  | 1.47 <sup>B</sup> ±0.60  | 1.22 <sup>B</sup> ±0.25↓  | 1.21±0.22               | 1.34±0.22                |
| other <i>trans</i> 18:1                   | 0.32±0.13                | 0.32±0.07                 | 0.30±0.06                | 0.30±0.07                 | 0.26 <sup>a</sup> ±0.05 | 0.32 <sup>a</sup> ±0.06↑ |
| C18:2 <i>cis</i> -6                       | 2.44 <sup>A</sup> ±0.37  | 2.11 <sup>A</sup> ±0.36↓  | 2.43 <sup>B</sup> ±0.37  | 2.06 <sup>B</sup> ±0.36↓  | 2.30±0.23               | 2.19±0.65                |
| CLA                                       | 0.41 <sup>A</sup> ±0.09  | 0.50 <sup>A</sup> ±0.10↑  | 0.40 <sup>B</sup> ±0.08  | 0.46 <sup>B</sup> ±0.11↑  | 0.39±0.13               | 0.48±0.10                |
| C18:3 $\omega$ 3                          | 0.35 <sup>a</sup> ±0.06  | 0.32 <sup>a</sup> ±0.09↓  | 0.34±0.06                | 0.32±0.08                 | 0.36±0.05               | 0.31±0.10                |
| C20:1                                     | 0.15±0.06                | 0.15±0.07                 | 0.13±0.06                | 0.15±0.07                 | 0.12±0.08               | 0.16±0.07                |
| C20:4 $\omega$ 6                          | 0.15 <sup>A</sup> ±0.04  | 0.18 <sup>A</sup> ±0.03↑  | 0.15 <sup>B</sup> ±0.04  | 0.19 <sup>B</sup> ±0.03↑  | 0.17±0.04               | 0.19±0.02                |
| SFA                                       | 54.95 <sup>A</sup> ±4.67 | 60.07 <sup>A</sup> ±3.01↑ | 56.37 <sup>B</sup> ±4.15 | 59.94 <sup>B</sup> ±3.50↑ | 59.85±3.16              | 59.50±3.52               |
| MUFA                                      | 38.89 <sup>A</sup> ±4.27 | 30.28 <sup>A</sup> ±2.28↓ | 37.71 <sup>B</sup> ±4.08 | 30.26 <sup>B</sup> ±2.58↓ | 34.04±4.21              | 31.18±2.64               |
| PUFA                                      | 3.38 <sup>A</sup> ±0.43  | 3.08 <sup>A</sup> ±0.48↓  | 3.36 <sup>B</sup> ±0.40  | 2.98 <sup>B</sup> ±0.45↓  | 3.24±0.33               | 3.16±0.81                |
| UFA                                       | 42.28 <sup>A</sup> ±4.29 | 33.36 <sup>A</sup> ±2.39↓ | 41.07 <sup>B</sup> ±4.07 | 33.26 <sup>B</sup> ±2.68↓ | 37.28±4.52              | 34.33±3.31               |
| SCFA                                      | 1.64±0.50                | 1.66±0.45                 | 1.62±0.52                | 1.69±0.44                 | 1.62±0.28               | 1.61±0.28                |
| MCFA                                      | 46.01 <sup>A</sup> ±4.22 | 56.56 <sup>A</sup> ±3.16↑ | 47.38 <sup>B</sup> ±4.36 | 56.37 <sup>B</sup> ±3.92↑ | 50.52±4.72              | 56.74±4.50               |
| LCFA                                      | 48.23 <sup>A</sup> ±4.67 | 35.37 <sup>A</sup> ±3.18↓ | 47.12 <sup>B</sup> ±5.01 | 35.28 <sup>B</sup> ±3.70↓ | 43.75±6.93              | 35.64±4.65               |
| <i>trans</i> FA                           | 2.53±0.66                | 2.63±0.45                 | 2.58±0.74                | 2.67±0.51                 | 2.17±0.43               | 2.58±0.27                |
| DI                                        | 0.62 <sup>A</sup> ±0.10  | 0.35 <sup>A</sup> ±0.03↓  | 0.59 <sup>B</sup> ±0.09  | 0.35 <sup>B</sup> ±0.03↓  | 0.52 <sup>C</sup> ±0.10 | 0.36 <sup>C</sup> ±0.03↓ |
| <hr/>                                     |                          |                           |                          |                           |                         |                          |
| Fat                                       | 4.10 <sup>a</sup> ±0.96  | 3.89 <sup>a</sup> ±0.60↓  | 4.21±1.01                | 4.10±0.76                 | 3.65±0.35               | 3.78±0.81                |
| Protein                                   | 3.12 <sup>A</sup> ±0.26  | 3.74 <sup>A</sup> ±0.32↑  | 3.14 <sup>B</sup> ±0.23  | 3.74 <sup>B</sup> ±0.29↑  | 3.25 <sup>C</sup> ±0.12 | 3.71 <sup>C</sup> ±0.18↑ |
| Lactose                                   | 4.96 <sup>A</sup> ±0.23  | 4.76 <sup>A</sup> ±0.39↓  | 4.97 <sup>B</sup> ±0.22  | 4.82 <sup>B</sup> ±0.25↓  | 4.95±0.16               | 4.86±0.16                |

DI – Index of Desaturation; SFA – Saturated Fatty Acids; MUFA – Monounsaturated Fatty Acids; UFA – Unsaturated Fatty Acids; SCFA – Short Chain Fatty Acids; MCFA – Medium Chain Fatty Acids; LSFA – Long Chain Fatty Acids; n – number of animals; ↑ - indicates higher content of FA in 2nd phase of lactation comparing to 1st phase of lactation; ↓ - indicates lower content of FA in 2nd phase of lactation comparing to 1st phase of lactation; a, b, c, d – values differ significantly between polymorphisms within rows ( $P < 0.05$ ); A, B, C, D – values differ highly significantly between polymorphisms within rows ( $P < 0.01$ ).

Table S 2. Percentage (mean  $\pm$  SD) of fatty acids, fat, protein and lactose in milk from Polish Holstein-Frisian cows during 1st and 2nd phase of lactation depending on A293V Single Nucleotide Polymorphism (SNP) in Stearoyl-CoA Desaturase (*SCD1*) gene.

| Fatty acid<br>(%)                     | <i>SCD1</i> gene polymorphism |                                            |                               |                                            |                               |                                            |
|---------------------------------------|-------------------------------|--------------------------------------------|-------------------------------|--------------------------------------------|-------------------------------|--------------------------------------------|
|                                       | AA                            |                                            | VA                            |                                            | VV                            |                                            |
|                                       | (n = 82)                      |                                            | (n = 57)                      |                                            | (n = 5)                       |                                            |
|                                       | 1 <sup>st</sup>               | 2 <sup>nd</sup>                            | 1 <sup>st</sup>               | 2 <sup>nd</sup>                            | 1 <sup>st</sup>               | 2 <sup>nd</sup>                            |
| C4:0                                  | 0.74 $\pm$ 0.33               | 0.72 $\pm$ 0.26                            | 0.72 $\pm$ 0.27               | 0.79 $\pm$ 0.22                            | 0.82 $\pm$ 0.38               | 0.63 $\pm$ 0.33                            |
| C6:0                                  | 0.89 $\pm$ 0.25               | 0.90 $\pm$ 0.20                            | 0.89 <sup>a</sup> $\pm$ 0.18  | 0.97 <sup>a</sup> $\pm$ 0.17 $\uparrow$    | 0.88 $\pm$ 0.32               | 0.87 $\pm$ 0.24                            |
| C8:0                                  | 0.73 $\pm$ 0.16               | 0.76 $\pm$ 0.12                            | 0.73 <sup>A</sup> $\pm$ 0.16  | 0.81 <sup>A</sup> $\pm$ 0.12 $\uparrow$    | 0.65 $\pm$ 0.27               | 0.76 $\pm$ 0.11                            |
| C10:0                                 | 1.88 <sup>A</sup> $\pm$ 0.48  | 2.19 <sup>A</sup> $\pm$ 0.35 $\uparrow$    | 1.89 <sup>B</sup> $\pm$ 0.60  | 2.38 <sup>B</sup> $\pm$ 0.38 $\uparrow$    | 1.54 $\pm$ 0.72               | 2.26 $\pm$ 0.30                            |
| C12:0                                 | 2.26 <sup>A</sup> $\pm$ 0.62  | 3.01 <sup>A</sup> $\pm$ 0.52 $\uparrow$    | 2.22 <sup>B</sup> $\pm$ 0.79  | 3.23 <sup>B</sup> $\pm$ 0.50 $\uparrow$    | 1.78 $\pm$ 0.88               | 3.23 $\pm$ 0.46                            |
| C13:0                                 | 0.12 $\pm$ 0.15               | 0.11 $\pm$ 0.03 $\downarrow$               | 0.13 $\pm$ 0.19               | 0.12 $\pm$ 0.04 $\downarrow$               | 0.08 $\pm$ 0.08               | 0.16 $\pm$ 0.09                            |
| C14:0                                 | 8.10 <sup>A</sup> $\pm$ 1.48  | 11.92 <sup>A</sup> $\pm$ 0.86 $\uparrow$   | 7.65 <sup>B</sup> $\pm$ 1.82  | 11.15 <sup>B</sup> $\pm$ 1.08 $\uparrow$   | 6.93 <sup>a</sup> $\pm$ 1.92  | 11.06 <sup>a</sup> $\pm$ 0.54 $\uparrow$   |
| C15:0                                 | 0.87 <sup>A</sup> $\pm$ 0.22  | 1.35 <sup>A</sup> $\pm$ 0.19 $\uparrow$    | 0.80 <sup>B</sup> $\pm$ 0.25  | 1.32 <sup>B</sup> $\pm$ 0.28 $\uparrow$    | 0.75 <sup>a</sup> $\pm$ 0.26  | 1.50 <sup>a</sup> $\pm$ 0.59 $\uparrow$    |
| C16:0                                 | 27.79 <sup>A</sup> $\pm$ 2.14 | 30.80 <sup>A</sup> $\pm$ 2.71 $\uparrow$   | 27.73 <sup>B</sup> $\pm$ 2.15 | 30.31 <sup>B</sup> $\pm$ 2.74 $\uparrow$   | 26.90 <sup>a</sup> $\pm$ 2.05 | 31.46 <sup>a</sup> $\pm$ 2.48 $\uparrow$   |
| C17:0                                 | 0.69 <sup>A</sup> $\pm$ 0.15  | 0.57 <sup>A</sup> $\pm$ 0.08 $\downarrow$  | 0.67 <sup>B</sup> $\pm$ 0.12  | 0.58 <sup>B</sup> $\pm$ 0.07 $\downarrow$  | 0.80 <sup>a</sup> $\pm$ 0.19  | 0.56 <sup>a</sup> $\pm$ 0.11 $\downarrow$  |
| C18:0                                 | 11.52 <sup>A</sup> $\pm$ 1.55 | 8.28 <sup>A</sup> $\pm$ 1.38 $\downarrow$  | 11.89 <sup>B</sup> $\pm$ 1.69 | 8.64 <sup>B</sup> $\pm$ 1.60 $\downarrow$  | 13.24 <sup>C</sup> $\pm$ 1.90 | 7.49 <sup>C</sup> $\pm$ 1.21 $\downarrow$  |
| C20:0                                 | 0.12 $\pm$ 0.04               | 0.12 $\pm$ 0.03                            | 0.12 $\pm$ 0.03               | 0.12 $\pm$ 0.03                            | 0.13 $\pm$ 0.05               | 0.10 $\pm$ 0.02                            |
| C14:1                                 | 0.87 <sup>A</sup> $\pm$ 0.27  | 1.67 <sup>A</sup> $\pm$ 0.34 $\uparrow$    | 0.71 <sup>B</sup> $\pm$ 0.24  | 1.46 <sup>B</sup> $\pm$ 0.24 $\uparrow$    | 0.69 <sup>a</sup> $\pm$ 0.28  | 1.47 <sup>a</sup> $\pm$ 0.27 $\uparrow$    |
| DI C14                                | 0.10 <sup>A</sup> $\pm$ 0.02  | 0.13 <sup>A</sup> $\pm$ 0.02 $\uparrow$    | 0.08 <sup>B</sup> $\pm$ 0.02  | 0.12 <sup>B</sup> $\pm$ 0.02 $\uparrow$    | 0.09 <sup>a</sup> $\pm$ 0.02  | 0.12 <sup>a</sup> $\pm$ 0.02 $\uparrow$    |
| C16:1                                 | 4.27 <sup>A</sup> $\pm$ 1.42  | 5.63 <sup>A</sup> $\pm$ 1.20 $\uparrow$    | 4.55 <sup>B</sup> $\pm$ 1.46  | 5.65 <sup>B</sup> $\pm$ 1.25 $\uparrow$    | 4.24 <sup>C</sup> $\pm$ 1.39  | 6.75 <sup>C</sup> $\pm$ 0.92 $\uparrow$    |
| DI C16                                | 0.13 <sup>A</sup> $\pm$ 0.04  | 0.15 <sup>A</sup> $\pm$ 0.03 $\uparrow$    | 0.14 <sup>a</sup> $\pm$ 0.04  | 0.16 <sup>a</sup> $\pm$ 0.03 $\uparrow$    | 0.14 <sup>b</sup> $\pm$ 0.05  | 0.18 <sup>b</sup> $\pm$ 0.02 $\uparrow$    |
| C17:1                                 | 0.49 <sup>A</sup> $\pm$ 0.13  | 0.28 <sup>A</sup> $\pm$ 0.09 $\downarrow$  | 0.49 <sup>B</sup> $\pm$ 0.16  | 0.30 <sup>B</sup> $\pm$ 0.09 $\downarrow$  | 0.57 <sup>a</sup> $\pm$ 0.09  | 0.32 <sup>a</sup> $\pm$ 0.07 $\downarrow$  |
| C18:1 <i>cis</i> -9                   | 27.26 <sup>A</sup> $\pm$ 3.92 | 19.38 <sup>A</sup> $\pm$ 2.25 $\downarrow$ | 27.28 <sup>B</sup> $\pm$ 4.59 | 19.02 <sup>B</sup> $\pm$ 2.10 $\downarrow$ | 26.87 <sup>C</sup> $\pm$ 2.97 | 17.67 <sup>C</sup> $\pm$ 1.71 $\downarrow$ |
| C18:1 <i>cis</i> -8 ( <i>cis</i> -11) | 1.27 <sup>A</sup> $\pm$ 0.19  | 0.96 <sup>A</sup> $\pm$ 0.23 $\downarrow$  | 1.26 <sup>B</sup> $\pm$ 0.22  | 0.94 <sup>B</sup> $\pm$ 0.23 $\downarrow$  | 1.22 <sup>a</sup> $\pm$ 0.11  | 0.87 <sup>a</sup> $\pm$ 0.22 $\downarrow$  |
| DI C18                                | 0.70 $\pm$ 0.04               | 0.71 $\pm$ 0.04                            | 0.69 $\pm$ 0.04               | 0.70 $\pm$ 0.04                            | 0.69 $\pm$ 0.03               | 0.71 $\pm$ 0.02                            |
| C18:1 <i>trans</i> -9                 | 0.80 <sup>A</sup> $\pm$ 0.62  | 1.07 <sup>A</sup> $\pm$ 0.32 $\uparrow$    | 0.86 <sup>B</sup> $\pm$ 0.58  | 1.13 <sup>B</sup> $\pm$ 0.36 $\uparrow$    | 0.70 $\pm$ 0.70               | 1.26 $\pm$ 0.29                            |

|                                           |                          |                           |                          |                           |                          |                           |
|-------------------------------------------|--------------------------|---------------------------|--------------------------|---------------------------|--------------------------|---------------------------|
| C18:1 <i>trans</i> -7 ( <i>trans</i> -11) | 1.48 <sup>A</sup> ±0.59  | 1.23 <sup>A</sup> ±0.24↓  | 1.28±0.36                | 1.22±0.25↓                | 1.59 <sup>B</sup> ±0.14  | 1.14 <sup>B</sup> ±0.15↓  |
| other <i>trans</i> 18:1                   | 0.30 <sup>a</sup> ±0.08  | 0.33 <sup>a</sup> ±0.08↑  | 0.30±0.09                | 0.30±0.06                 | 0.52±0.41                | 0.28±0.07                 |
| C18:2 <i>cis</i> -6                       | 2.48 <sup>A</sup> ±0.38  | 2.15 <sup>A</sup> ±0.39↓  | 2.36 <sup>B</sup> ±0.36  | 2.05 <sup>B</sup> ±0.34↓  | 2.41 <sup>a</sup> ±0.24  | 1.78 <sup>a</sup> ±0.16↓  |
| CLA                                       | 0.41 <sup>A</sup> ±0.09  | 0.48 <sup>A</sup> ±0.11↑  | 2.36 <sup>B</sup> ±0.36  | 2.06 <sup>B</sup> ±0.34↓  | 0.42±0.07                | 0.46±0.06                 |
| C18:3 $\omega$ 3                          | 0.35±0.06                | 0.33±0.10                 | 0.34 <sup>a</sup> ±0.06  | 0.31 <sup>a</sup> ±0.06↓  | 0.36 <sup>b</sup> ±0.09  | 0.27 <sup>b</sup> ±0.05↓  |
| C20:1                                     | 0.15±0.06                | 0.15±0.07                 | 0.14±0.06                | 0.16±0.07                 | 0.11±0.09                | 0.14±0.07                 |
| C20:4 $\omega$ 6                          | 0.15 <sup>A</sup> ±0.04  | 0.19 <sup>A</sup> ±0.03↑  | 0.15 <sup>B</sup> ±0.04  | 0.18 <sup>B</sup> ±0.03↑  | 0.12±0.05                | 0.17±0.05                 |
| SFA                                       | 55.73 <sup>A</sup> ±4.38 | 59.71 <sup>A</sup> ±3.21↑ | 55.63 <sup>B</sup> ±4.84 | 60.41 <sup>B</sup> ±3.21↑ | 54.49±4.72               | 60.07±2.24                |
| MUFA                                      | 38.24 <sup>A</sup> ±4.09 | 30.55 <sup>A</sup> ±2.46↓ | 38.21 <sup>B</sup> ±4.69 | 30.02 <sup>B</sup> ±2.34↓ | 39.75 <sup>C</sup> ±3.43 | 29.71 <sup>C</sup> ±1.44↓ |
| PUFA                                      | 3.43 <sup>A</sup> ±0.42  | 3.12 <sup>A</sup> ±0.52↓  | 3.28 <sup>B</sup> ±0.40  | 2.99 <sup>B</sup> ±0.42↓  | 3.37 <sup>C</sup> ±0.32  | 2.63 <sup>C</sup> ±0.18↓  |
| UFA                                       | 41.67 <sup>A</sup> ±4.15 | 33.67 <sup>A</sup> ±2.63↓ | 41.49 <sup>B</sup> ±4.70 | 33.01 <sup>B</sup> ±2.40↓ | 43.12 <sup>a</sup> ±3.37 | 32.34 <sup>a</sup> ±1.32↓ |
| SCFA                                      | 1.64±0.55                | 1.62±0.46                 | 1.61±0.39                | 1.76±0.38                 | 1.69±0.68                | 1.49±0.57                 |
| MCFA                                      | 46.91 <sup>A</sup> ±4.11 | 56.43 <sup>A</sup> ±3.33↑ | 46.60 <sup>B</sup> ±4.68 | 56.42 <sup>B</sup> ±3.71↑ | 43.56 <sup>C</sup> ±4.88 | 58.66 <sup>C</sup> ±2.73↑ |
| LCFA                                      | 47.51 <sup>A</sup> ±4.56 | 35.49 <sup>A</sup> ±3.30↓ | 47.57 <sup>B</sup> ±5.49 | 35.41 <sup>B</sup> ±3.53↓ | 51.02 <sup>C</sup> ±4.24 | 32.41 <sup>C</sup> ±3.18↓ |
| <i>trans</i> FA                           | 2.58±0.73                | 2.64±0.45                 | 2.44 <sup>a</sup> ±0.60  | 2.65 <sup>a</sup> ±0.50↑  | 2.67±0.70                | 2.62±0.38                 |
| DI                                        | 0.61 <sup>A</sup> ±0.10  | 0.35 <sup>A</sup> ±0.03↓  | 0.61 <sup>B</sup> ±0.11  | 0.34 <sup>B</sup> ±0.03↓  | 0.64 <sup>C</sup> ±0.09  | 0.34 <sup>C</sup> ±0.01↓  |
| <hr/>                                     |                          |                           |                          |                           |                          |                           |
| Fat                                       | 4.01±1.03                | 3.93±0.72                 | 4.30 <sup>a</sup> ±0.88  | 4.02 <sup>a</sup> ±0.62↓  | 3.95±0.74                | 3.83±0.37                 |
| Protein                                   | 3.11 <sup>A</sup> ±0.26  | 3.72 <sup>A</sup> ±0.32↑  | 3.15 <sup>B</sup> ±0.24  | 3.76±0.29↑                | 3.13 <sup>C</sup> ±0.17  | 3.71 <sup>C</sup> ±0.16↑  |
| Lactose                                   | 4.96 <sup>A</sup> ±0.24  | 4.81 <sup>A</sup> ±0.30↓  | 4.97 <sup>B</sup> ±0.20  | 4.75 <sup>B</sup> ±0.39↓  | 4.99±0.13                | 4.70±0.26                 |

DI – Index of Desaturation; SFA – Saturated Fatty Acids; MUFA – Monounsaturated Fatty Acids; UFA – Unsaturated Fatty Acids; SCFA – Short Chain Fatty Acids; MCFA – Medium Chain Fatty Acids; LSFA – Long Chain Fatty Acids; n – number of animals; ↑ - indicates higher content of FA in 2nd phase of lactation comparing to 1st phase of lactation; ↓ - indicates lower content of FA in 2nd phase of lactation comparing to 1st phase of lactation; a, b, c, d – values differ significantly between polymorphisms within rows ( $P < 0.05$ ); A, B, C, D – values differ highly significantly between polymorphisms within rows ( $P < 0.01$ ).

Table S 3. Percentage (mean  $\pm$  SD) of fatty acids, fat, protein and lactose in milk from Polish Holstein-Frisian cows during 1st and 2nd phase of lactation depending on K232A Single Nucleotide Polymorphism (SNP) in Diglyceride Acyltransferase (*DGAT1*) gene.

| Fatty acid<br>(%)                     | <i>DGAT1</i> gene polymorphism |                                            |                               |                                            |                               |                                            |
|---------------------------------------|--------------------------------|--------------------------------------------|-------------------------------|--------------------------------------------|-------------------------------|--------------------------------------------|
|                                       | AA                             |                                            | KA                            |                                            | KK                            |                                            |
|                                       | (n = 73)                       |                                            | (n = 61)                      |                                            | (n = 10)                      |                                            |
|                                       | 1 <sup>st</sup>                | 2 <sup>nd</sup>                            | 1 <sup>st</sup>               | 2 <sup>nd</sup>                            | 1 <sup>st</sup>               | 2 <sup>nd</sup>                            |
| C4:0                                  | 0.74 $\pm$ 0.32                | 0.73 $\pm$ 0.24                            | 0.76 $\pm$ 0.27               | 0.74 $\pm$ 0.26                            | 0.56 <sup>a</sup> $\pm$ 0.33  | 0.86 <sup>a</sup> $\pm$ 0.23 $\uparrow$    |
| C6:0                                  | 0.86 $\pm$ 0.23                | 0.90 $\pm$ 0.18                            | 0.94 $\pm$ 0.23               | 0.93 $\pm$ 0.20                            | 0.80 <sup>a</sup> $\pm$ 0.15  | 1.06 <sup>a</sup> $\pm$ 0.18 $\uparrow$    |
| C8:0                                  | 0.70 <sup>A</sup> $\pm$ 0.16   | 0.77 <sup>A</sup> $\pm$ 0.11 $\uparrow$    | 0.76 $\pm$ 0.17               | 0.79 $\pm$ 0.13                            | 0.73 <sup>a</sup> $\pm$ 0.11  | 0.88 <sup>a</sup> $\pm$ 0.12 $\uparrow$    |
| C10:0                                 | 1.81 <sup>A</sup> $\pm$ 0.52   | 2.25 <sup>A</sup> $\pm$ 0.36 $\uparrow$    | 1.92 <sup>B</sup> $\pm$ 0.56  | 2.26 <sup>B</sup> $\pm$ 0.39 $\uparrow$    | 1.98 <sup>a</sup> $\pm$ 0.48  | 2.46 <sup>a</sup> $\pm$ 0.35 $\uparrow$    |
| C12:0                                 | 2.15 <sup>A</sup> $\pm$ 0.67   | 3.07 <sup>A</sup> $\pm$ 0.61 $\uparrow$    | 2.29 <sup>B</sup> $\pm$ 0.74  | 3.10 <sup>B</sup> $\pm$ 0.49 $\uparrow$    | 2.41 <sup>c</sup> $\pm$ 0.65  | 3.35 <sup>c</sup> $\pm$ 0.38 $\uparrow$    |
| C13:0                                 | 0.13 $\pm$ 0.17                | 0.12 $\pm$ 0.05                            | 0.12 $\pm$ 0.17               | 0.11 $\pm$ 0.03                            | 0.08 $\pm$ 0.06               | 0.11 $\pm$ 0.03                            |
| C14:0                                 | 7.79 <sup>A</sup> $\pm$ 1.51   | 11.20 <sup>A</sup> $\pm$ 0.99 $\uparrow$   | 8.14 <sup>B</sup> $\pm$ 1.84  | 10.85 <sup>B</sup> $\pm$ 0.91 $\uparrow$   | 8.16 <sup>c</sup> $\pm$ 1.31  | 10.60 <sup>c</sup> $\pm$ 0.64 $\uparrow$   |
| C15:0                                 | 0.84 <sup>A</sup> $\pm$ 0.22   | 1.37 <sup>A</sup> $\pm$ 0.29 $\uparrow$    | 0.83 <sup>B</sup> $\pm$ 0.21  | 1.32 <sup>B</sup> $\pm$ 0.19 $\uparrow$    | 0.89 <sup>a</sup> $\pm$ 0.38  | 1.24 <sup>a</sup> $\pm$ 0.21 $\uparrow$    |
| C16:0                                 | 27.22 <sup>A</sup> $\pm$ 1.85  | 30.22 <sup>A</sup> $\pm$ 2.79 $\uparrow$   | 28.29 <sup>B</sup> $\pm$ 2.27 | 31.10 <sup>B</sup> $\pm$ 2.59 $\uparrow$   | 28.15 $\pm$ 2.54              | 30.66 $\pm$ 2.66 $\uparrow$                |
| C17:0                                 | 0.69 <sup>A</sup> $\pm$ 0.12   | 0.59 <sup>A</sup> $\pm$ 0.07 $\downarrow$  | 0.67 <sup>B</sup> $\pm$ 0.12  | 0.55 <sup>B</sup> $\pm$ 0.09 $\downarrow$  | 0.73 $\pm$ 0.33               | 0.58 $\pm$ 0.06                            |
| C18:0                                 | 11.88 <sup>A</sup> $\pm$ 1.71  | 8.54 <sup>A</sup> $\pm$ 1.63 $\downarrow$  | 11.70 <sup>B</sup> $\pm$ 1.57 | 8.23 <sup>B</sup> $\pm$ 1.30 $\downarrow$  | 10.70 <sup>c</sup> $\pm$ 1.32 | 8.31 <sup>c</sup> $\pm$ 1.35 $\downarrow$  |
| C20:0                                 | 0.13 $\pm$ 0.03                | 0.12 $\pm$ 0.03                            | 0.12 $\pm$ 0.04               | 0.12 $\pm$ 0.02                            | 0.12 $\pm$ 0.04               | 0.12 $\pm$ 0.03                            |
| C14:1                                 | 0.76 <sup>A</sup> $\pm$ 0.27   | 1.57 <sup>A</sup> $\pm$ 0.36 $\uparrow$    | 0.87 <sup>B</sup> $\pm$ 0.26  | 1.60 <sup>B</sup> $\pm$ 0.28 $\uparrow$    | 0.73 <sup>c</sup> $\pm$ 0.19  | 1.49 <sup>c</sup> $\pm$ 0.18 $\uparrow$    |
| DI C14                                | 0.09 <sup>A</sup> $\pm$ 0.03   | 0.12 <sup>A</sup> $\pm$ 0.02 $\uparrow$    | 0.10 <sup>B</sup> $\pm$ 0.02  | 0.13 <sup>B</sup> $\pm$ 0.02 $\uparrow$    | 0.08 <sup>c</sup> $\pm$ 0.02  | 0.12 <sup>c</sup> $\pm$ 0.01 $\uparrow$    |
| C16:1                                 | 4.59 <sup>A</sup> $\pm$ 1.44   | 5.47 <sup>A</sup> $\pm$ 1.22 $\uparrow$    | 3.99 <sup>B</sup> $\pm$ 1.28  | 5.88 <sup>B</sup> $\pm$ 1.22 $\uparrow$    | 5.26 $\pm$ 1.68               | 5.90 $\pm$ 1.13                            |
| DI C16                                | 0.14 $\pm$ 0.04                | 0.15 $\pm$ 0.03                            | 0.12 <sup>A</sup> $\pm$ 0.04  | 0.16 <sup>A</sup> $\pm$ 0.03 $\uparrow$    | 0.16 $\pm$ 0.05               | 0.16 $\pm$ 0.03                            |
| C17:1                                 | 0.50 <sup>A</sup> $\pm$ 0.14   | 0.29 <sup>A</sup> $\pm$ 0.09 $\downarrow$  | 0.50 <sup>B</sup> $\pm$ 0.15  | 0.30 <sup>B</sup> $\pm$ 0.09 $\downarrow$  | 0.45 <sup>c</sup> $\pm$ 0.12  | 0.27 <sup>c</sup> $\pm$ 0.08 $\downarrow$  |
| C18:1 <i>cis</i> -9                   | 22.38 <sup>A</sup> $\pm$ 4.05  | 19.36 <sup>A</sup> $\pm$ 2.19 $\downarrow$ | 22.43 <sup>B</sup> $\pm$ 4.18 | 19.05 <sup>B</sup> $\pm$ 2.25 $\downarrow$ | 26.28 <sup>c</sup> $\pm$ 5.07 | 18.66 <sup>c</sup> $\pm$ 1.94 $\downarrow$ |
| C18:1 <i>cis</i> -8 ( <i>cis</i> -11) | 1.27 <sup>A</sup> $\pm$ 0.20   | 0.99 <sup>A</sup> $\pm$ 0.25 $\downarrow$  | 1.27 <sup>B</sup> $\pm$ 0.20  | 0.92 <sup>B</sup> $\pm$ 0.20 $\downarrow$  | 1.13 <sup>c</sup> $\pm$ 0.17  | 0.78 <sup>c</sup> $\pm$ 0.14 $\downarrow$  |
| DI C18                                | 0.70 $\pm$ 0.04                | 0.71 $\pm$ 0.04                            | 0.70 $\pm$ 0.04               | 0.71 $\pm$ 0.04                            | 0.71 $\pm$ 0.04               | 0.70 $\pm$ 0.03                            |
| C18:1 <i>trans</i> -9                 | 0.92 <sup>a</sup> $\pm$ 0.63   | 1.09 <sup>a</sup> $\pm$ 0.36 $\uparrow$    | 0.67 <sup>A</sup> $\pm$ 0.52  | 1.11 <sup>A</sup> $\pm$ 0.32 $\uparrow$    | 1.08 $\pm$ 0.72               | 1.14 $\pm$ 0.35                            |

|                                           |                          |                           |                          |                           |                          |                           |
|-------------------------------------------|--------------------------|---------------------------|--------------------------|---------------------------|--------------------------|---------------------------|
| C18:1 <i>trans</i> -7 ( <i>trans</i> -11) | 1.45 <sup>a</sup> ±0.62  | 1.27 <sup>a</sup> ±0.25↓  | 1.40 <sup>A</sup> ±0.35  | 1.10 <sup>A</sup> ±0.23↓  | 1.10±0.23                | 1.17±0.16                 |
| other <i>trans</i> 18:1                   | 0.31±0.13                | 0.31±0.07                 | 0.31±0.09                | 0.33±0.07                 | 0.28±0.08                | 0.29±0.05                 |
| C18:2 <i>cis</i> -6                       | 2.42 <sup>A</sup> ±0.38  | 2.18 <sup>A</sup> ±0.37↓  | 2.49 <sup>B</sup> ±0.34  | 2.01 <sup>B</sup> ±0.37↓  | 2.12±0.27                | 2.00±0.31                 |
| CLA                                       | 0.41 <sup>A</sup> ±0.10  | 0.48 <sup>A</sup> ±0.10↑  | 0.42 <sup>B</sup> ±0.08  | 0.48 <sup>B</sup> ±0.12↑  | 0.35 <sup>C</sup> ±0.05  | 0.48 <sup>C</sup> ±0.09↑  |
| C18:3 $\omega$ 3                          | 0.35±0.06                | 0.35±0.09                 | 0.34 <sup>A</sup> ±0.06  | 0.30 <sup>A</sup> ±0.07↓  | 0.31±0.07                | 0.28±0.07                 |
| C20:1                                     | 0.14±0.06                | 0.14±0.07                 | 0.16±0.06                | 0.16±0.06                 | 0.12±0.06                | 0.15±0.06                 |
| C20:4 $\omega$ 6                          | 0.15 <sup>A</sup> ±0.04  | 0.19 <sup>A</sup> ±0.03↑  | 0.15 <sup>B</sup> ±0.04  | 0.18 <sup>B</sup> ±0.03↑  | 0.16±0.04                | 0.18±0.02                 |
| SFA                                       | 54.95 <sup>A</sup> ±4.28 | 59.88 <sup>A</sup> ±3.09↑ | 56.54 <sup>B</sup> ±4.82 | 60.11 <sup>B</sup> ±3.35↑ | 55.32 <sup>a</sup> ±4.27 | 60.21 <sup>a</sup> ±3.12↑ |
| MUFA                                      | 38.63 <sup>A</sup> ±4.16 | 30.34 <sup>A</sup> ±2.31↓ | 37.95 <sup>B</sup> ±4.48 | 30.38 <sup>B</sup> ±2.57↓ | 37.75 <sup>C</sup> ±4.44 | 29.69 <sup>C</sup> ±2.20↓ |
| PUFA                                      | 3.37 <sup>A</sup> ±0.42  | 3.16 <sup>A</sup> ±0.49↓  | 3.48 <sup>B</sup> ±0.39  | 2.94 <sup>B</sup> ±0.47↓  | 2.97±0.33                | 2.93±0.42↓                |
| UFA                                       | 42.00 <sup>A</sup> ±4.26 | 33.50 <sup>A</sup> ±2.47↓ | 41.38 <sup>B</sup> ±4.43 | 33.32 <sup>B</sup> ±2.61↓ | 40.71 <sup>C</sup> ±4.40 | 32.62 <sup>C</sup> ±2.43↓ |
| SCFA                                      | 1.60±0.52                | 1.63±0.42                 | 1.71±0.47                | 1.67±0.46                 | 1.36 <sup>a</sup> ±0.44  | 1.91 <sup>a</sup> ±0.41↑  |
| MCFA                                      | 45.99 <sup>A</sup> ±3.85 | 56.04 <sup>A</sup> ±3.50↑ | 47.20 <sup>B</sup> ±4.85 | 57.03 <sup>B</sup> ±3.37↑ | 48.39 <sup>C</sup> ±4.49 | 56.68 <sup>C</sup> ±3.76↑ |
| LCFA                                      | 48.01 <sup>A</sup> ±4.64 | 35.86 <sup>A</sup> ±3.49↓ | 47.67 <sup>B</sup> ±5.17 | 34.00 <sup>B</sup> ±3.25↓ | 44.95 <sup>C</sup> ±5.43 | 34.39 <sup>C</sup> ±3.51↓ |
| <i>trans</i> FA                           | 2.66±0.76                | 2.67±0.52                 | 2.39 <sup>A</sup> ±0.55  | 2.62 <sup>A</sup> ±0.41↑  | 2.45±0.66                | 2.59±0.39                 |
| DI                                        | 0.62 <sup>A</sup> ±0.10  | 0.35 <sup>A</sup> ±0.03↓  | 0.60 <sup>B</sup> ±0.10  | 0.35 <sup>B</sup> ±0.03↓  | 0.60 <sup>C</sup> ±0.11  | 0.34 <sup>C</sup> ±0.02↓  |
| <hr/>                                     |                          |                           |                          |                           |                          |                           |
| Fat                                       | 4.03 <sup>a</sup> ±1.00  | 3.77 <sup>a</sup> ±0.62↓  | 4.15±0.92                | 4.14±0.63                 | 4.63±0.92                | 4.26±0.90                 |
| Protein                                   | 3.11 <sup>A</sup> ±0.27  | 3.67 <sup>A</sup> ±0.30↑  | 3.14 <sup>B</sup> ±0.22  | 3.78 <sup>B</sup> ±0.27↑  | 3.20 <sup>C</sup> ±0.22  | 3.96 <sup>C</sup> ±0.39↑  |
| Lactose                                   | 4.96 <sup>A</sup> ±0.21  | 4.78 <sup>A</sup> ±0.34↓  | 4.98 <sup>B</sup> ±0.24  | 4.80 <sup>B</sup> ±0.32↓  | 4.91±0.24                | 4.74±0.45                 |

DI – Index of Desaturation; SFA – Saturated Fatty Acids; MUFA – Monounsaturated Fatty Acids; UFA – Unsaturated Fatty Acids; SCFA – Short Chain Fatty Acids; MCFA – Medium Chain Fatty Acids; LSFA – Long Chain Fatty Acids; n – number of animals; ↑ - indicates higher content of FA in 2nd phase of lactation comparing to 1st phase of lactation; ↓ - indicates lower content of FA in 2nd phase of lactation comparing to 1st phase of lactation; a, b, c, d – values differ significantly between polymorphisms within rows ( $P < 0.05$ ); A, B, C, D – values differ highly significantly between polymorphisms within rows ( $P < 0.01$ ).
